# Supplementary material
Source: Springer Nature journal article supplement (https://www.springermedizin.de/resource/supplementary/12982_2007_53_MOESM6_ESM.pdf/9604370)
Supplement: MOESM6 [file 9604370]

## Open Access for the non-English-speaking world: Overcoming the language barrier.

دسترسی آزاد برای گوینده های که به زبان انگلیسی تسلط ندارد: از بین بردن مانع زبانی.

نویسنده/Author: Isaac Chun-Hai FUNG

### خلاصه/Abstract

این سرمقاله مشکلات موانع زبانی در مفاهیم علمی را با وجود حرکت آزاد موفقیت های اخیر بر ملا میسازد. چهار بدیل جهت از بین بردن موانع زبانی در ژورنالهای لسان انگلیسی پیشنهاد گردیده.

1- خلاصه های تهیه شده در لسانهای متبادل توسط مولفین (نویسنده ها).

2- ترجمه باز Wiki

3- بورد بین المللی مولفین و مترجمین

4- ترجمه ژورنال به زبان متبادل

پدیدار شدن موضوعات نو در اپیدیمولوژی ( Emerging themes in Epidemiology ) جهت

اجراات سریع اعلام میدارد که !

ترجمه خلاصه و یا مکمل متن توسط نویسنده گان بقسم یک فایل اضافی قابل قبول خواهد بود.
